# Supplementary material for: Long-term every-other-day administration of DMAMCL has little effect on aging and age-associated physiological decline in mice
Source: publisher site journal article supplement (doi:10.18632/aging.101932), 2019-05-02
Supplement: Supplementary file [file aging-v11i9-101932-supplementary-material-SD1.pdf]

## SUPPLEMENTARY MATERIAL

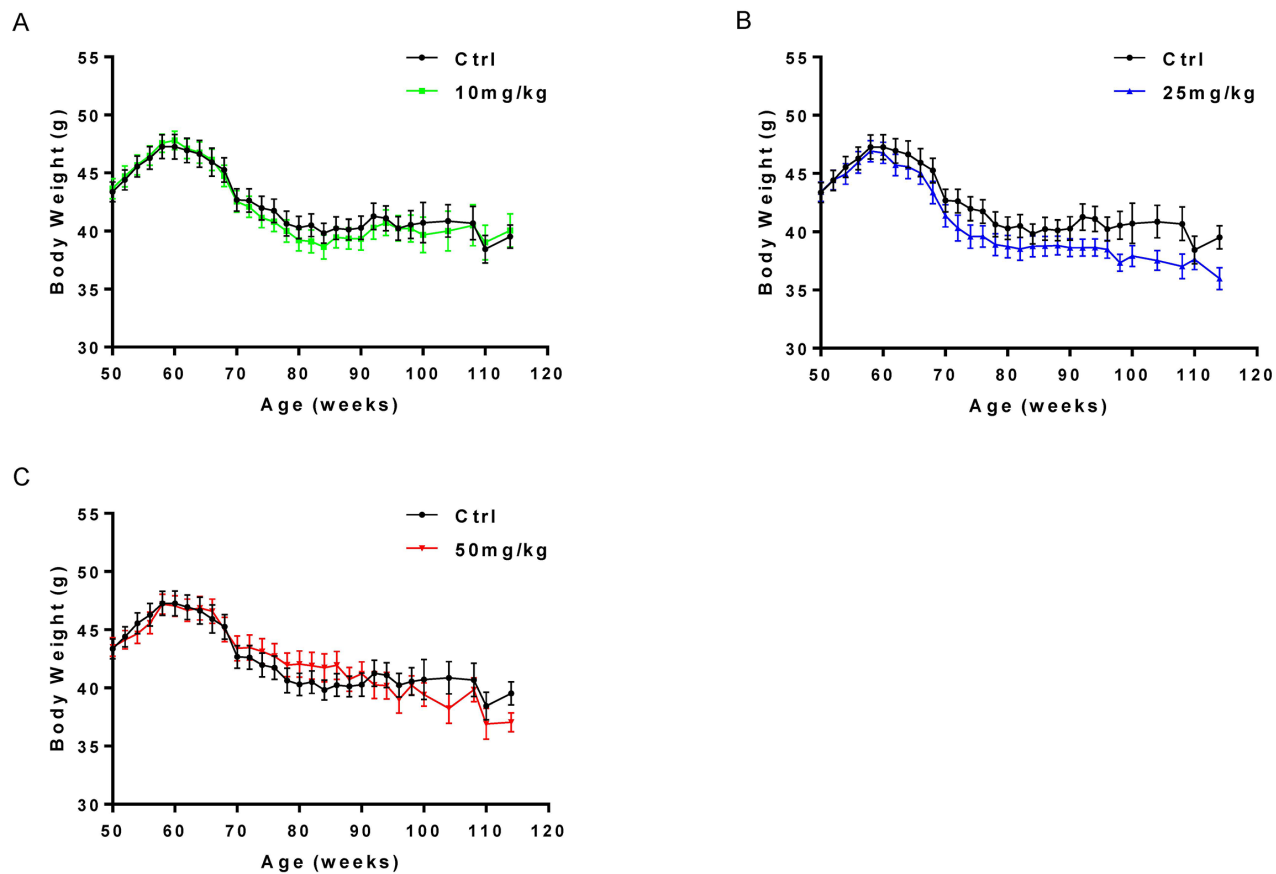

**Figure S1. Effects of DMAMCL on body weight.** (A) Body weight of control and 10 mg/kg/EOD-fed mice. (B) Body weight of control and 25 mg/kg/EOD-fed mice. (C) Body weight of control and 50 mg/kg/EOD-fed mice.

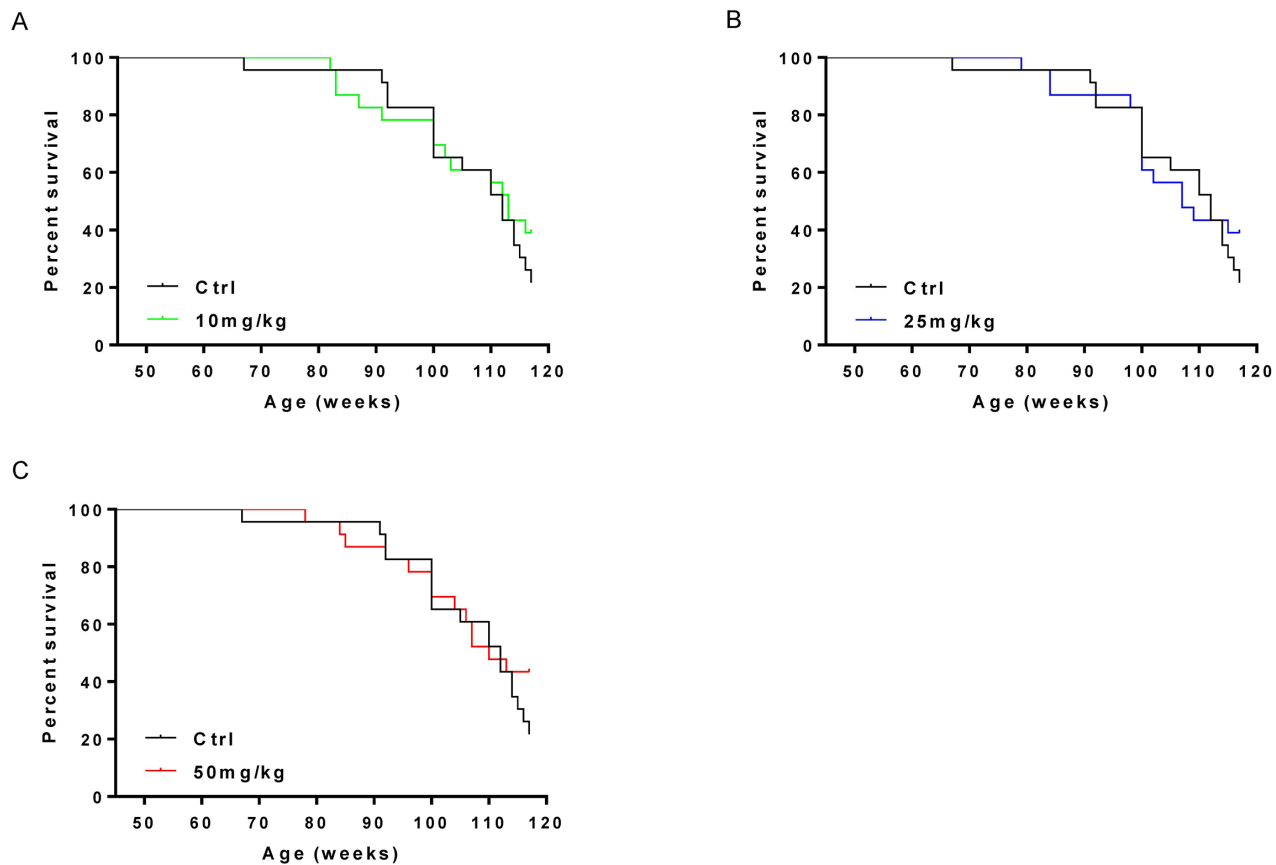

**Figure S2. Effects of DMAMCL on survival.** Kaplan-Meier survival curve for mice treated with low (A) (log-rank test:  $P = 0.4143$ ), median (B) (log-rank test:  $P = 0.4962$ ) and high (C) (log-rank test:  $P = 0.3514$ ) doses of DMAMCL.

A

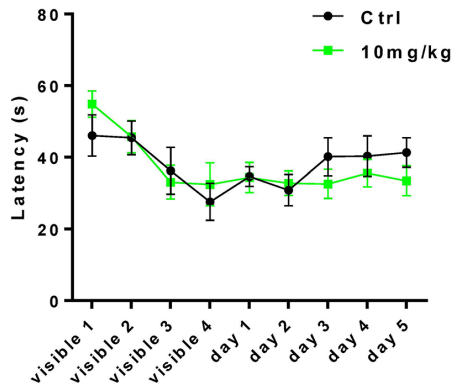

B

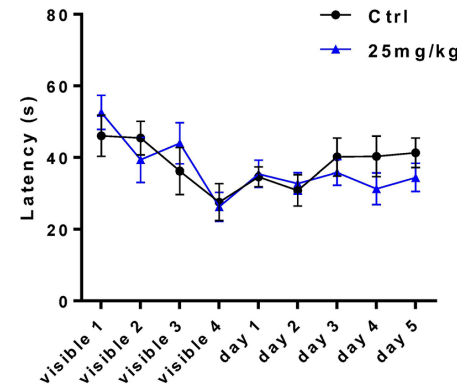

C

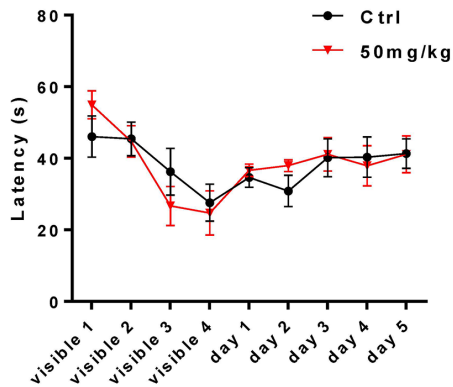

**Figure S3.** Latency (the time to find platform) of mice treated with low (A) (two-way repeated-measures ANOVA: treatment x time  $F(8,160) = 0.8227$ ,  $P = 0.5837$ ; time  $F(8,160) = 4.484$ ,  $P < 0.0001$ ; treatment  $F(1,20) = 0.07017$ ,  $P = 0.7938$ ), median (B) (two-way repeated-measures ANOVA: treatment x time  $F(8,160) = 0.9149$ ,  $P = 0.5057$ ; time  $F(8,160) = 4.244$ ,  $P < 0.0001$ ; treatment  $F(1,20) = 0.1172$ ,  $P = 0.7356$ ), and high (C) (two-way repeated-measures ANOVA: treatment x time  $F(8,160) = 0.8062$ ,  $P = 0.5980$ ; time  $F(8,160) = 5.745$ ,  $P < 0.0001$ ; treatment  $F(1,20) = 0.009139$ ,  $P = 0.9248$ ) doses of DMAMCL in the Morris water maze assay.

A

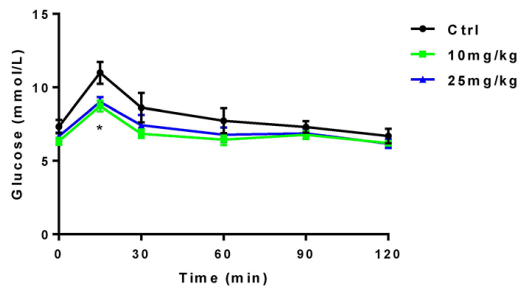

B

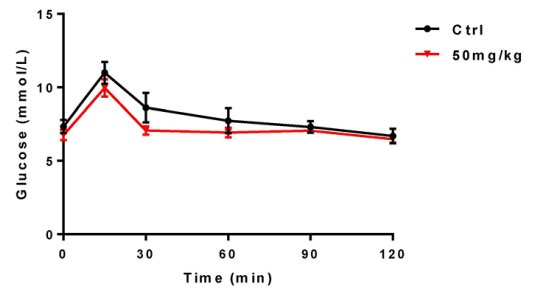

**Figure S4. Assessment of glucose homeostasis.** (A) OGTT curves of control and low and median doses of DMAMCL-treated mice (n =10). (B) OGTT curves of control and high dose of DMAMCL-treated mice.

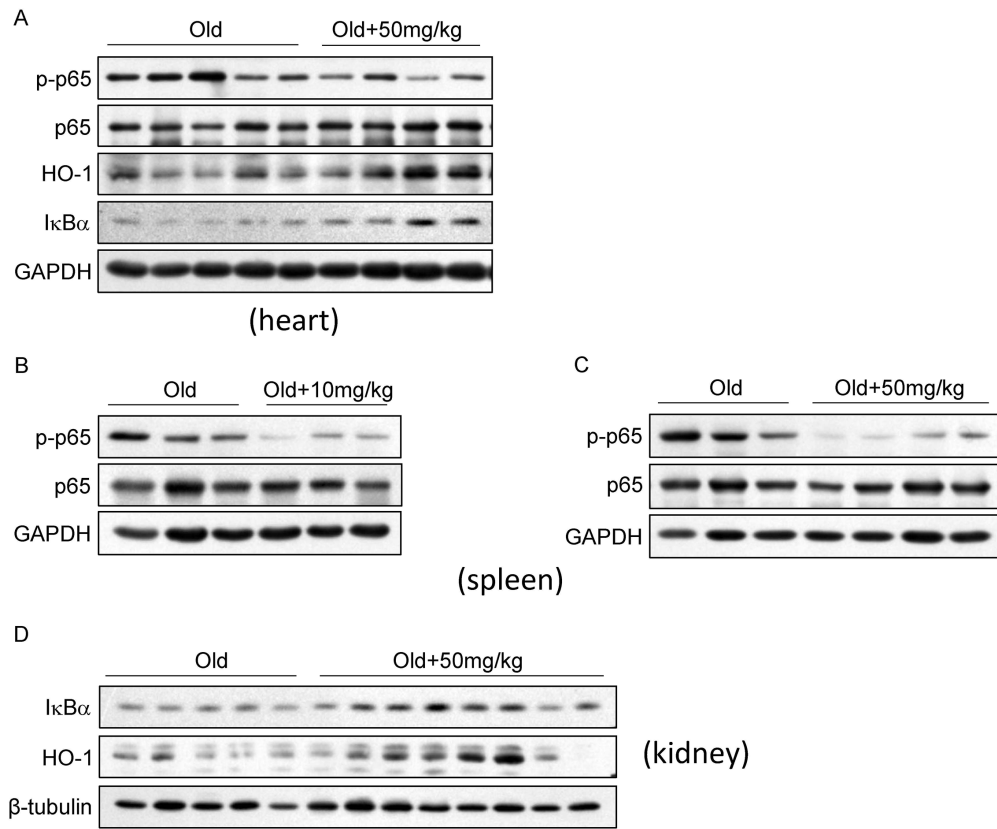

**Figure S5. Effects of DMAMCL on protein expression in multiple tissues in old mice.** The total protein was isolated from the heart, spleen and kidney tissues and protein expression were examined by Western blot (n=3-8). **(A)** The effect of high dose DMAMCL treatment on the p-p65, p65, HO-1 and IκBα protein expression in heart. **(B and C)** The expression levels of p-p65 and p65 in spleen were examined in mice treated with low **(B)** and high **(C)** doses of DMAMCL. **(D)** The effect of high dose DMAMCL treatment on the IκBα and HO-1 protein expression in kidney.
